# Supplementary material for: Microbial Recycling of Polylactic Acid Food Packaging Waste into Carboxylates via Hydrolysis and Mixed-Culture Fermentation
Source: MDPI journal article supplement (doi:10.3390/microorganisms11082103), 2023-08-18
Supplement: s1 [file s1]

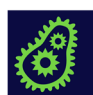

## Supplementary Materials

# Microbial Recycling of Polylactic Acid Food Packaging Waste into Carboxylates via Hydrolysis and Mixed-Culture Fermentation

David P.B.T.B. Strik<sup>1\*</sup>, Brian Heusschen<sup>1</sup><sup>1</sup> Environmental Technology, Wageningen University & Research, 6708 WG Wageningen, The Netherlands

\* Correspondence: david.strik@wur.nl

## Blank figures

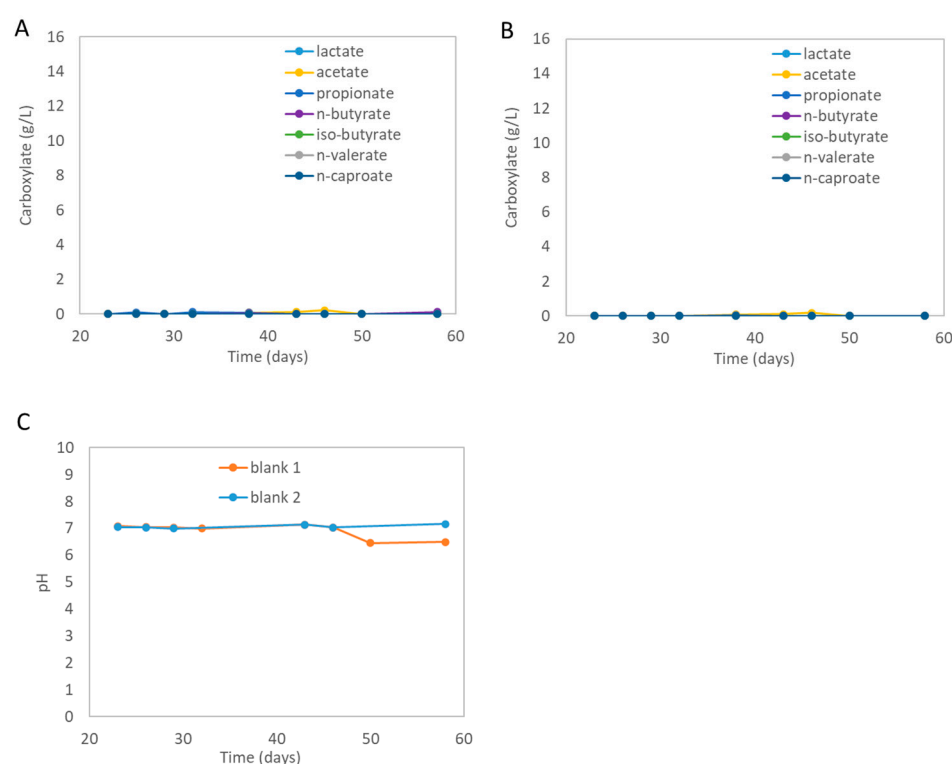

**Figure S1.** A. Carboxylates concentration measured of blank experiment 1; B. Carboxylates concentration measured of blank experiment 2; C. pH profile of blank experiment during fermentation.
